# Supplementary material for: Comorbid and co-occurring conditions in migraine and associated risk of increasing headache pain intensity and headache frequency: results of the migraine in America symptoms and treatment (MAST) study
Source: PubMed Central journal article supplement (PMC7053108; doi:10.1186/s10194-020-1084-y), 2020-03-02

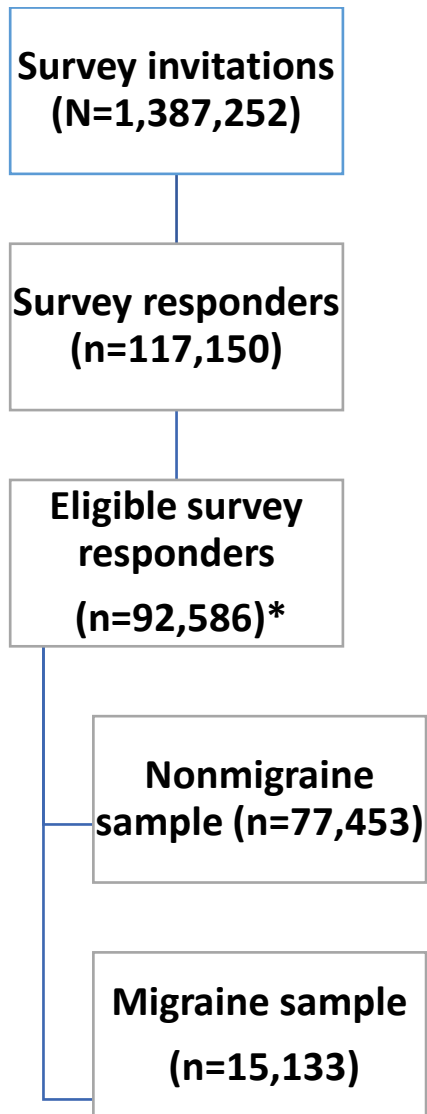

Supplement: 10194_2020_1084_MOESM1_ESM.pdf [file 10194_2020_1084_MOESM1_ESM.pdf]
